# Supplementary material for: Taxonomy and Phylogenetic Research on Ralstonia solanacearum Species Complex: A Complex Pathogen with Extraordinary Economic Consequences
Source: Pathogens. 2020 Oct 25;9(11):886. doi: 10.3390/pathogens9110886 (PMC7694096; doi:10.3390/pathogens9110886)
Supplement: Supplementary file 1 [file pathogens-09-00886-s001.xlsx]

## Sheet: Sheet2
Table S1. Strain information used to create ClonalFrame analyses and Minimum Spanning tree in Figure 4.
Strain Number	Strain Name	Geographical Origin	Host of Origin
Phylotype I
1	YC45	China	Zingiber officinale (Ginger)
3	UW 757	Guatemala	Osteospermum ecklonis (African Daisy)
8	UTT25	India	Solanum lycopersicum (Tomato)
11	T523	Philippines	Solanum lycopersicum (Tomato)
13	SL2729	Korea	Solanum tuberosum (Potato)
15	SEPPX05	China	Sesamum indicum (Sesame)
16	SD54	China	Zingiber officinale (Ginger)
17	RSCM	China	Cucurbita maxima (Squash)
18	Rs-10-244	India	Capsicum frutescens (Chili)
19	RD15	Taiwan	Raphanus sativus (Radish)
25	P781	USA	Mandevilla boliviensis (Mandevilla)
27	OE1-1	Japan	Solanum melongena (Eggplant)
29	KACC10709	Korea	Solanum tubersoum (Potato)
33	HA4-1	China	Arachis hypogaea (Peanut)
34	GMI1000	French Guyana	Solanum lycopersicum (Tomato)
37	FQY_4	China	Soil
38	EP1	China	Solanum melongena (Eggplant)
39	CQPS-1	China	Nicotiana tabacum (Tobacco)
44	CaRsMep	India	Elettaria cardamomum (Green or true cardamom)
Phylotype IIA
7	UW25/K60	USA	Solanum lycopersicum (Tomato)
9	UA1612	Colombia	Musa spp. (Banana)
24	P822	Florida	Vaccinium spp. (Blueberry)
31	IBSBF2570	Brazil	Musa spp. (Banana)
Phylotype IIB
2	UY031	Uruguay	Solanum tubersoum (Potato)
4	UW551	Kenya	Pelargonium spp. (Geranium)
6	UW163	Peru	Musa paradisiaca (Plantain)
10	UA1579	Colombia	Musa spp. (Banana)
23	Po82	Mexico	Solanum tuberosum (Potato)
26	P673	USA	Epipremnum aureum (Pothos)
28	NCPPB909	Egypt	Solanum tuberosum (Potato)
30	IPO1609	Netherlands	Solanum tuberosum (Potato)
32	IBSBF1503	Brazil	Cucumis sativus (Cucumber)
35	Geo_99	Georgia	Capsicum annum (Pepper)
36	Geo_57	Georgia	Solanum tuberosum (Potato)
41	CFIA906	India	Solanum tuberosum (Potato)
42	CFBP6783	Martinique	Heliconia caribea (Heliconia)
43	CFBP1416	Costa Rica	Musa paradisiaca (Plantain)
Phylotype III
5	UW386	Nigeria	Soil
40	CMR15	Cameroon	Solanum lycopersicum (Tomato)
Phylotype IV
12	SL3175	Korea	Solanum tuberosum (Potato)
14	SL2064	Korea	Solanum tuberosum (Potato)
20	R229	Indonesia	Musa spp. (Banana)
21	R24	Indonesia	Syzygium aromaticum (Clove)
22	PSI07	Indonesia	Solanum lycopersicum (Tomato)
45	A2HRMardi	Malaysia	Musa spp. (Banana)

## Sheet: Sheet1
Table S2. Description of Ralstonia solanacearum species complex strains available in the NCBI GenBank database with associated host, country of isolation and sequencing technology used
Strain	Level	Phylotype	Host	Country of Isolation	Sequencing Technology
OE1-1	Complete	I	Solanum melongena (Eggplant)	Japan	Roche 454
FJAT-91	Complete	I	Solanum lycopersicum (Tomato)	China	PacBio
FJAT15252.F50	Complete	I	Solanum lycopersicum (Tomato)	China	Oxford Nanopore
FJAT1458.F1	Complete	I	Solanum lycopersicum (Tomato)	China	Oxford Nanopore
FJAT1458.F50	Complete	I	Solanum lycopersicum (Tomato)	China	Oxford Nanopore
FJAT1463.F50	Complete	I	Solanum lycopersicum (Tomato)	China	Oxford Nanopore
FJAT1463.F1	Complete	I	Solanum lycopersicum (Tomato)	China	Oxford Nanopore
FJAT15249.F50	Complete	I	Solanum lycopersicum (Tomato)	China	Oxford Nanopore
FJAT15252.F1	Complete	I	Solanum lycopersicum (Tomato)	China	Oxford Nanopore
FJAT15249.F1	Complete	I	Solanum lycopersicum (Tomato)	China	Oxford Nanopore
T78	Complete	I	Solanum tuberosum (Potato)	Korea	PacBio
EP1	Complete	I	Solanum melongena (Eggplant)	China	Illumina; PacBio
T60	Complete	I	Solanum tuberosum (Potato)	Korea	PacBio
FJAT454.F1	Complete	I	Solanum lycopersicum (Tomato)	China	Oxford Nanopore
FJAT448.F1	Complete	I	Solanum lycopersicum (Tomato)	China	Oxford Nanopore
FJAT448.F50	Complete	I	Solanum lycopersicum (Tomato)	China	Oxford Nanopore
SL3882	Complete	I	Solanum tuberosum (Potato)	Korea	PacBio
FJAT454.F50-1	Complete	I	Solanum lycopersicum (Tomato)	China	Oxford Nanopore
SEPPX05	Complete	I	Sesamum indicum (Sesame)	China	PacBio; Illumina HiSeq
HA4-1	Complete	I	Arachis hypogea (Groundnut)	China	PacBio
FJAT91.F50	Complete	I	Solanum lycopersicum (Tomato)	China	Oxford Nanopore
FJAT91-F1	Complete	I	Solanum lycopersicum (Tomato)	China	Oxford Nanopore
FJAT91-F8	Complete	I	NA	China	Oxford Nanopore
SL3300	Complete	I	Solanum tuberosum (Potato)	Korea	PacBio
FJAT15353.F8	Complete	I	Solanum lycopersicum (Tomato)	China	Oxford Nanopore
FJAT15353.F50	Complete	I	Solanum lycopersicum (Tomato)	China	Oxford Nanopore
FJAT15353.F1	Complete	I	Solanum lycopersicum (Tomato)	China	Oxford Nanopore
FJAT1303.F50	Complete	I	Solanum lycopersicum (Tomato)	China	Oxford Nanopore
FJAT1303.F8	Complete	I	Solanum lycopersicum (Tomato)	China	Oxford Nanopore
YC40-M	Complete	I	Rhizoma kaempferiae (Zingiberaceae)	China	PacBio
SL3822	Complete	I	Solanum tuberosum (Potato)	Korea	PacBio
CQPS-1	Complete	I	Nicotiana tabacum (Tobacco)	China	PacBio
B2	Complete	I	Nicotiana tabacum (Tobacco)	China	PacBio Sequel/Illumina HiSeq
204	Complete	I	Nicotiana tabacum (Tobacco)	China	PacBio Sequel/Illumina HiSeq
203	Complete	I	Nicotiana tabacum (Tobacco)	China	PacBio Sequel/Illumina HiSeq
202	Complete	I	Nicotiana tabacum (Tobacco)	China	PacBio Sequel/Illumina HiSeq
FJAT15244.F50	Complete	I	Solanum lycopersicum (Tomato)	China	Oxford Nanopore
RSCM	Complete	I	Cucurbita maxima (Squash)	China	Illumina HiSeq
FJAT15244.F1	Complete	I	Solanum lycopersicum (Tomato)	China	Oxford Nanopore
SL3755	Complete	I	Solanum tuberosum (Potato)	Korea	PacBio
YQ	Complete	I	Casuarina equisetifolia (Ironwood)	China	Oxford Nanopore
T117	Complete	I	Solanum tuberosum (Potato)	Korea	PacBio
T42	Complete	I	Solanum tuberosum (Potato)	Korea	PacBio
GMI1000	Complete	I	Solanum lycopersicum (Tomato)	French Guyana	Shotgun
SL3730	Complete	I	Solanum tuberosum (Potato)	Korea	PacBio
SL2729	Complete	I	Solanum tuberosum (Potato)	Korea	PacBio
FJAT442.F50	Complete	I	Solanum lycopersicum (Tomato)	China	Oxford Nanopore
FJAT442.F1	Complete	I	Solanum lycopersicum (Tomato)	China	Oxford Nanopore
FJAT1452.F50	Complete	I	Solanum lycopersicum (Tomato)	China	Oxford Nanopore
FJAT1452.F1	Complete	I	Solanum lycopersicum (Tomato)	China	Oxford Nanopore
FJAT445.F50	Complete	I	Solanum lycopersicum (Tomato)	China	Oxford Nanopore
FJAT445.F1	Complete	I	Solanum lycopersicum (Tomato)	China	Oxford Nanopore
FJAT15304.F6	Complete	I	Solanum lycopersicum (Tomato)	China	Oxford Nanopore
FJAT15340.F50	Complete	I	Solanum lycopersicum (Tomato)	China	Oxford Nanopore
FJAT15304.F50	Complete	I	Solanum lycopersicum (Tomato)	China	Oxford Nanopore
FJAT15340.F1	Complete	I	Solanum lycopersicum (Tomato)	China	Oxford Nanopore
FJAT15304.F1	Complete	I	Solanum lycopersicum (Tomato)	China	Oxford Nanopore
FJAT15340.F6	Complete	I	Solanum lycopersicum (Tomato)	China	Oxford Nanopore
SL2330	Complete	I	Solanum tuberosum (Potato)	Korea	PacBio
UW386	Complete	III	Soil	Nigeria	PacBio Sequel
FJAT1303.F1	Chromosome	I	Solanum lycopersicum (Tomato)	China	Oxford Nanopore
Rs-10-244	Chromosome	I	Capsicum annuum (Chilli Pepper)	India	Illumina HiSeq
Rs-T02	Scaffold	I	Solanum lycopersicum (Tomato)	China	Illumina HiSeq
SD54	Contig	I	Zingiber officinale (Ginger)	China	Roche 454
PSS1308	Contig	I	Solanum tuberosum (Potato)	Taiwan	Illumina GAIIx
PSS190	Contig	I	Solanum tuberosum (Potato)	Taiwan	Illumina GAIIx
RD15	Scaffold	I	Raphanus sativus (Radish)	Taiwan	Illumina GAIIx
Rs-09-161	Chromosome	I	Solanum melongena (Eggplant)	India	Illumina HiSeq
UW757	Scaffold	I	Osteospermum fruticosum (Osteospermum)	Guatemala	Illumina MiSeq
CFBP3059	Contig	III	Solanum melongena (Eggplant)	Burkina Faso	Illumina HiSeq
CMR15	Chromosome	III	Solanum lycopersicum (Tomato)	Cameroon	Roche 454 GSflx
Pe_49	Scaffold	I	Capsicum annuum ( Pepper)	Korea	Illumina NextSeq
To_28	Scaffold	I	Solanum lycopersicum (Tomato)	Korea	Illumina NextSeq
Pe_45	Scaffold	I	Capsicum annuum ( Pepper)	Korea	Illumina NextSeq
To_1	Scaffold	I	Solanum lycopersicum (Tomato)	Korea	Illumina NextSeq
Pe_24	Scaffold	I	Capsicum annuum ( Pepper)	Korea	Illumina NextSeq
Pe_13	Scaffold	I	Capsicum annuum ( Pepper)	Korea	Illumina NextSeq
Pe_18	Scaffold	I	Capsicum annuum ( Pepper)	Korea	Illumina NextSeq
Pe_15	Scaffold	I	Capsicum annuum ( Pepper)	Korea	Illumina NextSeq
Pe_30	Scaffold	I	Capsicum annuum ( Pepper)	Korea	Illumina NextSeq
Pe_3	Contig	I	Capsicum annuum ( Pepper)	Korea	Oxford Nanopore GridION; Illumina
Pe_42	Scaffold	I	Capsicum annuum ( Pepper)	Korea	Illumina NextSeq
To_36	Scaffold	I	Solanum lycopersicum (Tomato)	Korea	Illumina NextSeq
Pe_9	Scaffold	I	Capsicum annuum ( Pepper)	Korea	Illumina NextSeq
To_42	Scaffold	I	Solanum lycopersicum (Tomato)	Korea	Illumina NextSeq
SL3103	Complete	I	Solanum tuberosum (Potato)	Korea	PacBio
KACC10709	Complete	I	Solanum tuberosum (Potato)	Korea	Roche 454; Illumina MiSeq
To_53	Scaffold	I	Solanum lycopersicum (Tomato)	Korea	Illumina NextSeq
To_22	Scaffold	I	Solanum lycopersicum (Tomato)	Korea	Illumina NextSeq
P781	Contig	I	Mandevilla spp. (Mandevilla)	USA	Illumina HiSeq
FQY_4	Chromosome	I	Nicotiana tabacum (Tobacco)	China	Illumina
T110	Complete	I	Solanum tuberosum (Potato)	Korea	PacBio
T25	Complete	I	Solanum tuberosum (Potato)	Korea	PacBio
Y45	Scaffold	I	Nicotiana tabacum (Tobacco)	China	Illumina GA IIx
CaRs-Mep	Contig	I	Elettaria cardamomum (Small cardamom)	India	Illumina NextSeq 500
YC45	Complete	I	Zingiber officinale (Ginger)	China	PacBio
UTT-25	Contig	I	Solanum lycopersicum (Tomato)	India	Illumina MiSeq
Pe_52	Scaffold	I	Capsicum annuum ( Pepper)	Korea	Illumina NextSeq
To_7	Scaffold	I	Solanum lycopersicum (Tomato)	Korea	Illumina NextSeq
Pe_56	Scaffold	I	Capsicum annuum ( Pepper)	Korea	Illumina NextSeq
Pe_61	Scaffold	I	Capsicum annuum ( Pepper)	Korea	Illumina NextSeq
Pe_51	Scaffold	I	Capsicum annuum ( Pepper)	Korea	Illumina NextSeq
Pe_2	Scaffold	I	Capsicum annuum ( Pepper)	Korea	Illumina
To_63	Scaffold	I	Solanum lycopersicum (Tomato)	Korea	Illumina NextSeq
Pe_27	Contig	I	Capsicum annuum ( Pepper)	Korea	Oxford Nanopore GridION; Illumina
T523	Chromosome	I	Solanum lycopersicum (Tomato)	Phillippines	PacBio
10179	Contig	I	Solanum lycopersicum (Tomato)	Phillippines	IonTorrent
10154	Contig	I	Solanum lycopersicum (Tomato)	Phillippines	IonTorrent
10180	Contig	I	Solanum lycopersicum (Tomato)	Phillippines	IonTorrent
PSS4	Scaffold	I	Solanum tuberosum (Potato)	Taiwan	Illumina GAIIx
Pe_39	Contig	I	Capsicum annuum ( Pepper)	Korea	Oxford Nanopore GridION; Illumina
Pe_1	Contig	I	Capsicum annuum ( Pepper)	Korea	Oxford Nanopore GridION; Illumina
Pe_28	Scaffold	I	Capsicum annuum ( Pepper)	Korea	Illumina NextSeq
Pe_26	Scaffold	I	Capsicum annuum ( Pepper)	Korea	Illumina NextSeq
Pe_57	Contig	I	Capsicum annuum ( Pepper)	Korea	Oxford Nanopore GridION; Illumina
P824	Chromosome	I	Vaccinium corymbosum (Blueberry)	USA	Illumina HiSeq; PacBio
PSS216	Scaffold	I	Solanum tuberosum (Potato)	Taiwan	Illumina GAII
FJAT1458	Complete	I	Solanum lycopersicum (Tomato)	China	PacBio
Pe_4	Scaffold	I	Capsicum annuum ( Pepper)	Korea	Illumina NextSeq
FJAT-452	Scaffold	I	Solanum melongena (Eggplant)	China	Illumina HiSeq
FJAT-462	Scaffold	I	Capsicum annuum (Chilli Pepper)	China	Illumina HiSeq
FJAT-91	Scaffold	I	Solanum lycopersicum (Tomato)	China	Illumina HiSeq
FJAT-91	Contig	I	Solanum lycopersicum (Tomato)	China	Illumina GAIIx
FJAT-1458	Contig	I	Solanum lycopersicum (Tomato)	China	Illumina GAIIx
Rs476	Complete	I	Solanum lycopersicum (Tomato)	Brazil	Illumina HiSeq 2500
CRMRs218	Complete	I	Solanum melongena (Eggplant)	Brazil	Illumina HiSeq 2500
Tg03	Scaffold	I	Luffa cylindrica (Sponge Guard)	China	Illumina HiSeq
Cq01	Scaffold	I	Benincasa hispida (Wax Gourd)	China	Illumina HiSeq
Bg07	Scaffold	I	Momordica charantia (Bitter Melon)	China	Illumina HiSeq
Fm03	Contig	I	Siraitia grosvenorii (Monk Fruit)	China	Illumina HiSeq
VT0801	Contig	I	Solanum lycopersicum (Tomato)	Japan	IonTorrent
CCRMRs277	Scaffold	II	Musa spp. (Banana)	Brazil	Illumina MiSeq
CCRMRs287	Scaffold	II	Musa spp. (Banana)	Brazil	Illumina MiSeq
CCRMRs304	Scaffold	II	Musa spp. (Banana)	Brazil	Illumina MiSeq
CCRMRsB7	Scaffold	II	Musa spp. (Banana)	Brazil	Illumina MiSeq
B50	Scaffold	IIA	Musa spp. (Banana)	Brazil	Illumina HiSeq - 2000
BBAC-C1	Scaffold	IIA	Vaccinium spp. (High bush blueberry)	USA	Illumina HiSeq
CFBP2957	Chromosome	IIA	Solanum lycopersicum (Tomato)	Martinique	Roche 454 GSflx
CIP120	Contig	IIA	Solanum tuberosum (Potato)	Peru	Illumina HiSeq
Grenada 9-1	Scaffold	IIA	Musa spp. (Banana)	Brazil	Illumina HiSeq - 2000
IBSBF1900	Scaffold	IIA	Musa spp. (Banana)	Brazil	NA
K60	Contig	IIA	Solanum lycopersicum (Tomato)	USA	PacBio
P597	Contig	IIA	Solanum lycopersicum (Tomato)	USA	Illumina HiSeq
UW181	Scaffold	IIA	Musa paradisiaca (Plantain)	Venezuela	NA
UW700	Contig	IIA	Solanum lycopersicum (Tomato)	USA	PacBio Sequel
UA-1611	Chromosome	IIA	Musa spp. (Banana)	Colombia	Illumina MiSeq
UA-1612	Chromosome	IIA	Musa spp. (Banana)	Colombia	Illumina MiSeq
P816	Scaffold	IIA	Vaccinium spp. (High bush blueberry)	USA	Illumina HiSeq
P822	Contig	IIA	Vaccinium spp. (High bush blueberry)	USA	Illumina HiSeq
58_RSOL	Scaffold	IIA	NA	NA	NA
Rs489	Complete	IIA	Solanum lycopersicum (Tomato)	Brazil	Illumina HiSeq 2500
K60	Contig	IIA	Solanum lycopersicum (Tomato)	USA	NA
23-10BR	Contig	IIB	Solanum tuberosum (Potato)	Brazil	Roche 454
CFBP1416	Scaffold	IIB	Musa paradisiaca (Plantain)	CostaRica	Illumina HiSeq - 2000
CFBP3858	Scaffold	IIB	Solanum tuberosum (Potato)	NA	NA
CFBP6783	Scaffold	IIB	Heliconia caribea (Heliconia)	Martinique	Illumina HiSeq - 2000
CFBP7014	Scaffold	IIB	Anthurium andreanum (Anthurium)	Trinidad	NA
CIP417	Scaffold	IIB	Musa spp. (Banana)	Phillippines	Illumina HiSeq - 2000
Geo_304	Contig	IIB	Solanum tuberosum (Potato)	Georgia	Illumina
Geo_96	Scaffold	IIB	Solanum lycopersicum (Tomato)	Georgia	Illumina MiSeq
IBSBF1503	Complete	IIB	Cucumus sativus (Cucumber)	Brazil	PacBio RSII; Illumina MiSeq
IPO1609	Scaffold	IIB	Solanum tuberosum (Potato)	Netherlands	NA
Po82	Complete	IIB	Solanum tuberosum (Potato)	Mexico	Roche 454 GSflx
Rs488	Complete	IIB	Solanum lycopersicum (Tomato)	Brazil	Illumina HiSeq 2500
Rs2	Scaffold	IIB	Solanum tuberosum (Potato)	Mexico	Roche-454 GSflx
UW163	Complete	IIB	Musa paradisiaca (Plantain)	Peru	PacBio RSII; Illumina MiSeq
UW179	Scaffold	IIB	Musa spp. (Banana)	NA	Illumina HiSeq - 2000
UW24	Contig	IIB	Solanum tuberosum (Potato)	NA	Illumina MiSeq
UW365/POPS2	Contig	IIB	Solanum tuberosum (Potato)	China	Illumina MiSeq
UW491	Contig	IIB	Solanum tuberosum (Potato)	Colombia	Illumina MiSeq
UW551	Scaffold	IIB	Pelargonium spp. (Geranium)	Kenya	NA
UY031	Complete	IIB	Solanum commersonii (Wild Potato)	Uruguay	PacBio
10314	Contig	IIB	Musa acuminata (Banana)	Phillippines	IonTorrent
Molk2	Contig	IIB	Musa spp. (Banana)	Phillippines	NA
P673	Contig	IIB	Epipremnum aureum (Pothos)	USA	Illumina GAIIx; 454
UA1609	Chromosome	IIB	Musa spp. (Banana)	Colombia	Illumina MiSeq
UA1579	Chromosome	IIB	Musa spp. (Banana)	Colombia	Illumina MisSeq
IBSBF2571	Complete	IIB	Musa spp. (Banana)	Brazil	Illumina MiSeq
CIAT_078	Complete	IIB	Musa paradisiaca (Plantain)	Colombia	Oxford Nanopore MiniION
UA-1617	Chromosome	IIB	Musa paradisiaca (Plantain)	Colombia	Illumina MiSeq
UA-1591	Chromosome	IIB	Musa paradisiaca (Plantain)	Colombia	Illumina MiSeq
SFC	Complete	IIB	Musa spp. (Banana)	Brazil	Illumina MiSeq
IBSBF2570	Complete	IIB	Musa spp. (Banana)	Brazil	Illumina MiSeq
UW848	Contig	IIB	Pelargonium spp. (Geranium)	USA	Illumina iSeq
NCPPB909	Scaffold	IIB	Solanum tuberosum (Potato)	Egypt	Illumina HiSeq
Geo_57	Scaffold	IIB	Solanum tuberosum (Potato)	Georgia	Illumina MiSeq
Geo_99	Scaffold	IIB	Capsicum annuum (Chilli pepper)	Georgia	Illumina MiSeq
Geo_55	Contig	IIB	Solanum tuberosum (Potato)	Georgia	Illumina
Geo_6	Contig	IIB	Solanum tuberosum (Potato)	Georgia	Illumina
CFIA906	Scaffold	IIB	Solanum tuberosum (Potato)	India	Illumina MiSeq
CFBP8695	Complete	IIB	Solanum tuberosum (Potato)	Iran	Illumina NovaSeq
Geo_81	Contig	IIB	Solanum tuberosum (Potato)	Georgia	Illumina
POPS2	Contig	IIB	Solanum tuberosum (Potato)	China	Roche 454
NCPPB282	Contig	IIB	Solanum tuberosum (Potato)	Colombia	Roche 454
CFBP8697	Complete	IIB	Solanum tuberosum (Potato)	Iran	Illumina NovaSeq
Geo_230	Contig	IIB	Solanum tuberosum (Potato)	Georgia	Illumina
IBSBF1503	Scaffold	IIB	Cucumis sativus (Cucumber)	Brazil	Illumina HiSeq - 2000
UW163	Scaffold	IIB	Musa paradisiaca (Plantain)	Peru	Illumina HiSeq - 2000
UW551	Contig	IIB	Pelargonium spp. (Geranium)	Kenya	Illumina MiSeq
CFBP6783	Contig	IIB	Heliconia caribea (Heliconia)	Martinique	Illumina MiSeq
UW551	Contig	IIB	Pelargonium spp. (Geranium)	Kenya	Illumina MiSeq
R229	Contig	IV	Musa spp. (Banana)	Indonesia	Roche 454 GSflx
R24	Contig	IV	Syzygium aromaticum (Clove)	Indonesia	Roche 454 GSflx
PSI07	Complete	IV	Solanum lycopersicum (Tomato)	Indonesia	Roche 454 GSflx
A2-HR Mardi	Chromosome	IV	Musa spp. (Banana)	Malaysia	PacBio
SL3022	Complete	IV	Solanum tuberosum (Potato)	Korea	PacBio
SL3175	Complete	IV	Solanum tuberosum (Potato)	Korea	PacBio
T98	Complete	IV	Solanum tuberosum (Potato)	Korea	PacBio
T11	Complete	IV	Solanum tuberosum (Potato)	Korea	PacBio
T95	Complete	IV	Solanum tuberosum (Potato)	Korea	PacBio
SL2064	Complete	IV	Solanum tuberosum (Potato)	Korea	PacBio
KACC10722	Complete	IV	Solanum tuberosum (Potato)	Korea	Roche 454; Illumina MiSeq
T82	Complete	IV	Solanum tuberosum (Potato)	Korea	PacBio
SL2312	Complete	IV	Solanum tuberosum (Potato)	Korea	PacBio
T101	Complete	IV	Solanum tuberosum (Potato)	Korea	PacBio
T12	Complete	IV	Solanum tuberosum (Potato)	Korea	PacBio
T51	Complete	IV	Solanum tuberosum (Potato)	Korea	PacBio
NA : Information is not available
